# Supplementary material for: Postprandial Responses to a Standardised Meal in Hypertension: The Mediatory Role of Visceral Fat Mass
Source: MDPI journal article supplement (doi:10.3390/nu14214499), 2022-10-26
Supplement: s1 [file s1]

## **Postprandial responses to a standardised meal in hypertension: the mediatory role of visceral fat mass**

Panayiotis Louca<sup>1</sup>, Sarah E. Berry<sup>2</sup>, Kate Bermingham<sup>1, 2</sup>, Paul W. Franks<sup>3</sup>, Jonathan Wolf<sup>4</sup>, Tim D. Spector<sup>1</sup>, Ana M. Valdes<sup>5</sup>, Phil Chowienczyk<sup>6\*</sup>, Cristina Menni<sup>1\*</sup>

<sup>1</sup>Department of Twin Research, King's College London, St Thomas' Hospital Campus, London SE1 7EH

<sup>2</sup>Department of Nutritional Sciences, King's College London, Franklin Wilkins Building, SE1 9NH London.

<sup>3</sup> Genetic & Molecular Epidemiology Unit, Department of Clinical Sciences, Lund University, Malmo, SE-20502, Sweden.

<sup>4</sup> Zoe Global Limited, London SE1 7RW, UK.

<sup>5</sup> Nottingham NIHR Biomedical Research Centre at the School of Medicine, University of Nottingham, Nottingham, NG5 1PB, UK.

<sup>6</sup> Vascular Risk & Surgery, King's College London, St Thomas' Hospital Campus, London SE1 7EH.

\* denotes equal contribution.

### **Corresponding author:**

Dr. Cristina Menni.

Department of Twin Research, King's College London, St Thomas' Hospital Campus, Westminster Bridge Road, London SE1 7EH, UK

Phone: +44 (0) 207 188 7188 (ext. 52594); email: [cristina.menni@kcl.ac.uk](mailto:cristina.menni@kcl.ac.uk)

**Supplementary Table S1. Sensitivity analysis of fasting, and postprandial metabolic responses between hypertensive cases and controls, including overall results adjusted for age, sex, and BMI; removing those using antihypertensives; further adjusting for menopause; and when stratifying by sex.**

|               |          | Overall<br>(age, sex, BMI adjusted) |      | Removing those on<br>antihypertensive medication |      | Age, sex, BMI and menopausal<br>status adjusted |      | Females only<br>(n = 719) |      | Males only<br>(n = 270) |      |
|---------------|----------|-------------------------------------|------|--------------------------------------------------|------|-------------------------------------------------|------|---------------------------|------|-------------------------|------|
| Trait         | Metric   | Beta                                | SE   | Beta                                             | SE   | Beta                                            | SE   | Beta                      | SE   | Beta                    | SE   |
| Glucose       | Baseline | 0.18                                | 0.08 | 0.14                                             | 0.09 | 0.17                                            | 0.08 | 0.17                      | 0.10 | 0.21                    | 0.14 |
|               | Peak     | 0.15                                | 0.08 | 0.19                                             | 0.09 | 0.13                                            | 0.08 | 0.20                      | 0.10 | 0.07                    | 0.15 |
|               | Delta    | 0.07                                | 0.09 | 0.13                                             | 0.10 | 0.05                                            | 0.09 | 0.12                      | 0.11 | -0.04                   | 0.16 |
| GlycA         | Baseline | 0.26                                | 0.08 | 0.27                                             | 0.09 | 0.25                                            | 0.08 | 0.24                      | 0.10 | 0.34                    | 0.15 |
|               | Peak     | 0.29                                | 0.08 | 0.25                                             | 0.09 | 0.27                                            | 0.08 | 0.29                      | 0.10 | 0.30                    | 0.16 |
|               | Delta    | 0.19                                | 0.09 | 0.11                                             | 0.10 | 0.17                                            | 0.09 | 0.20                      | 0.10 | 0.17                    | 0.16 |
| Insulin       | Baseline | 0.34                                | 0.07 | 0.30                                             | 0.08 | 0.34                                            | 0.07 | 0.30                      | 0.08 | 0.43                    | 0.12 |
|               | Peak     | 0.17                                | 0.08 | 0.12                                             | 0.09 | 0.16                                            | 0.08 | 0.11                      | 0.10 | 0.37                    | 0.14 |
|               | Delta    | 0.15                                | 0.08 | 0.11                                             | 0.09 | 0.14                                            | 0.08 | 0.09                      | 0.10 | 0.36                    | 0.14 |
| Triglycerides | Baseline | 0.38                                | 0.08 | 0.41                                             | 0.09 | 0.38                                            | 0.08 | 0.43                      | 0.10 | 0.31                    | 0.15 |
|               | Peak     | 0.23                                | 0.08 | 0.18                                             | 0.09 | 0.22                                            | 0.08 | 0.29                      | 0.10 | 0.16                    | 0.15 |
|               | Delta    | 0.06                                | 0.09 | -0.01                                            | 0.10 | 0.04                                            | 0.09 | 0.07                      | 0.11 | 0.03                    | 0.16 |
